# Supplementary material for: Targeting the CoREST complex with dual histone deacetylase and demethylase inhibitors
Source: PubMed Central journal article supplement (PMC5754352; doi:10.1038/s41467-017-02242-4), 2018-01-04
Supplement: 41467_2017_2242_MOESM2_ESM.pdf [file 41467_2017_2242_MOESM2_ESM.pdf]

**Descriptions of Additional Supplementary Files:**

File Name: Supplementary Dataset 1

Description: All quantified data in a repository
